# Supplementary material for: Metal–organic framework derived NiS2 hollow spheres as multifunctional reactors for synergistic regulation of polysulfide confinement and redox conversion
Source: Royal Society of Chemistry journal article supplement (doi:10.1039/d1ta03621a), 2021-01-01
Supplement: d1ta03621a1.pdf [file d1ta03621a1.pdf]

# **Metal-Organic Framework Derived NiS<sub>2</sub> Hollow Spheres as Multifunctional Reactors for Synergistic Regulation of Polysulfides Confinement and Redox Conversion**

Shunyou Hu<sup>a+</sup>, Mingjie Yi<sup>a+</sup>, Sajid Hussain Siyal<sup>c</sup>, Dong Wu<sup>a</sup>, Hao Wang<sup>a</sup>, Zhenye Zhu<sup>a, \*</sup>, Jiaheng Zhang<sup>a, b \*</sup>

<sup>a</sup>Research Centre of Printed Flexible Electronics, School of Materials Science and Engineering, Harbin Institute of Technology, Shenzhen 518055, China.

<sup>b</sup>State Key Laboratory of Advanced Welding and Joining, Harbin Institute of Technology, Shenzhen 518055, China.

<sup>c</sup>Department of Metallurgy and Materials Engineering, Dawood University of Engineering and Technology, Karachi 74800, Sindh, Pakistan.

<sup>+</sup>These authors contributed equally to this work.

Corresponding author:

Jiaheng Zhang, Email: zhangjiaheng@hit.edu.cn

Zhenye Zhu, Email: zhuzy@hit.edu.cn

## Experimental section

### 1. The preparation process of C HSs

In a typical procedure, after carbonization of Ni-MOF under 450 °C for 6 h, the obtained Ni/C HSs powder was etched in 2 M HCl aqueous solution under 150 °C for 24 h. After cooling to room temperature, the C HSs powder was collected and washed with deionized water and ethanol for 3 times, respectively.

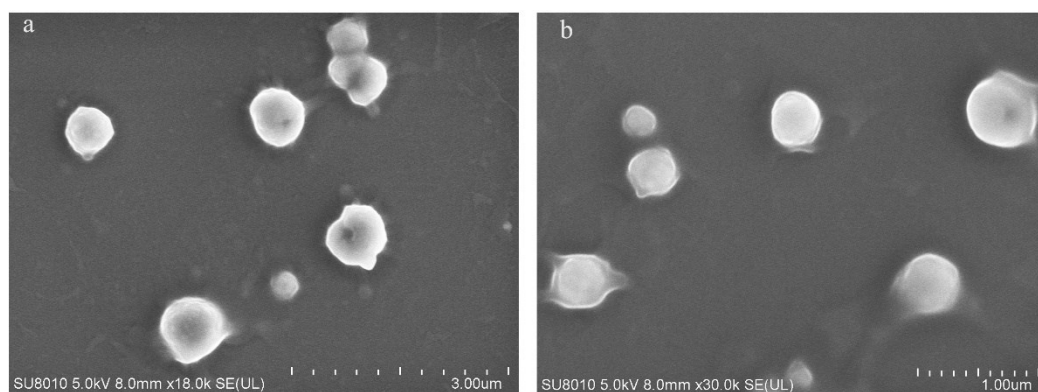

Fig. S1 SEM images of Ni-MOF.

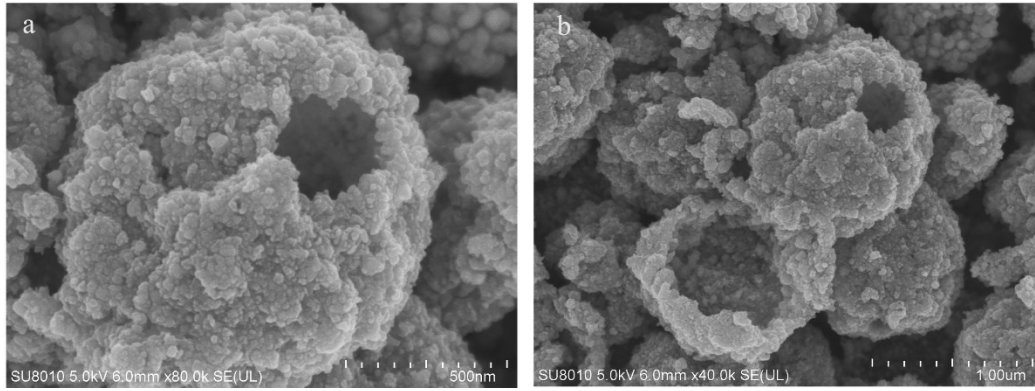

Fig. S2 SEM images of NiS<sub>2</sub>/C HSs.

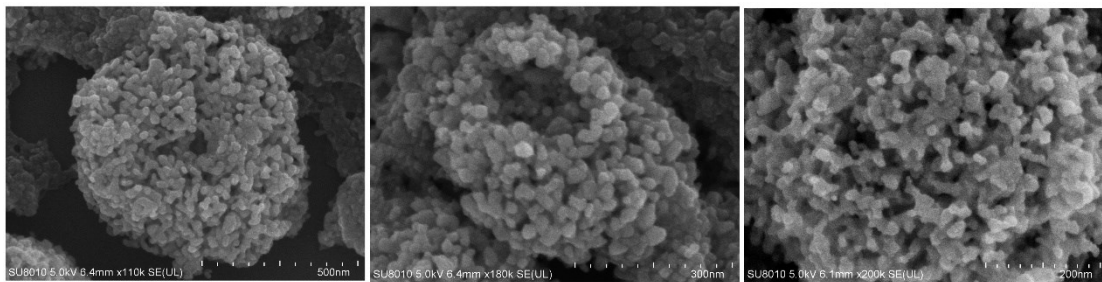

Fig. S3 SEM images of C HSs.

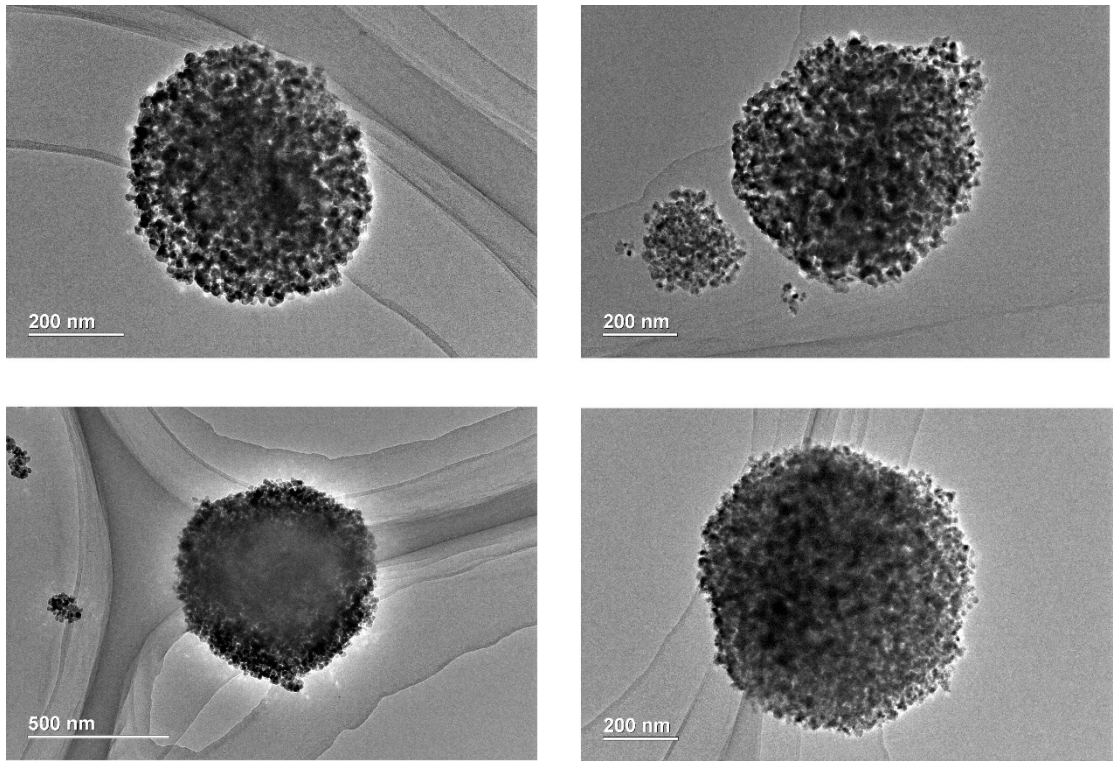

Fig. S4 TEM images of NiS<sub>2</sub>/C HSs.

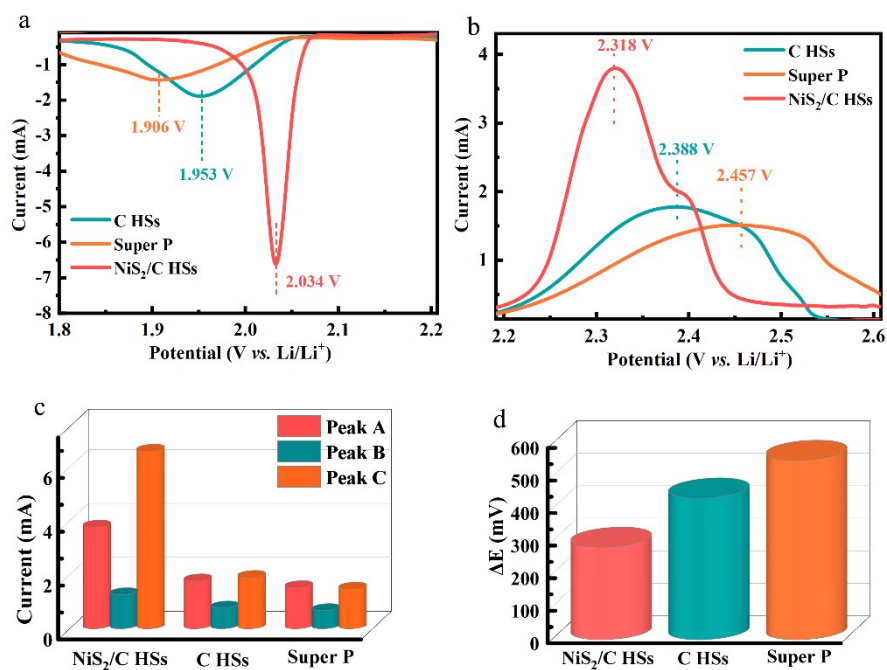

Fig. S5 The enlarged CV profiles of peak C (a) and peak A (b) of Li-S batteries with different cathodes. The current of the peak A, peak B and peak C of the CV profiles (c). The potential difference between peak A and peak C (d).

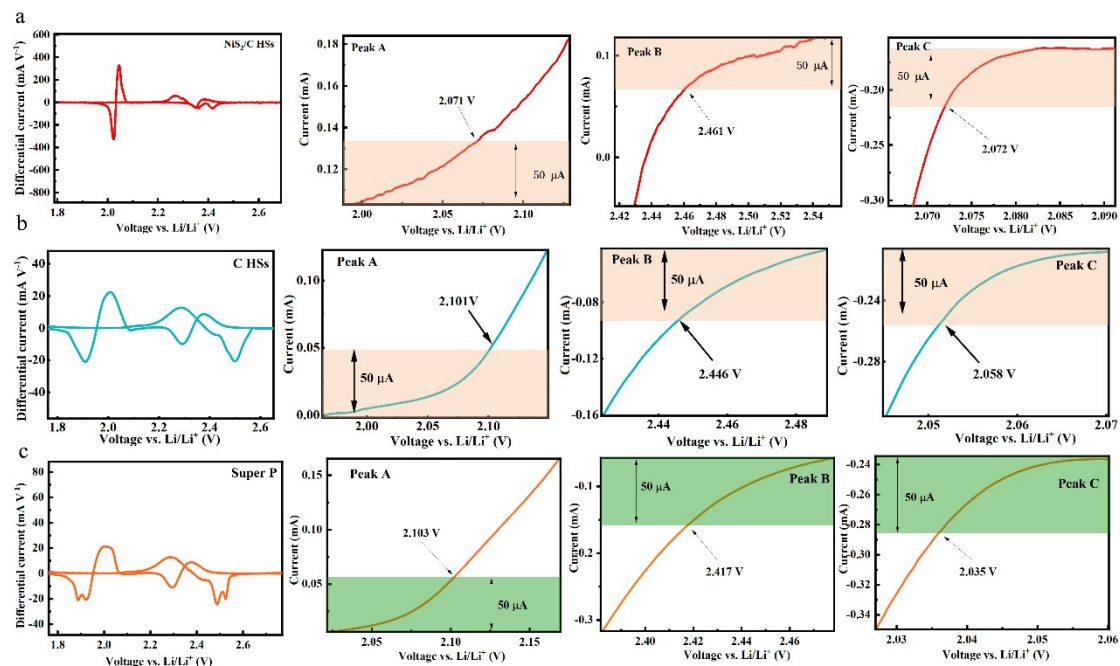

Fig. S6 Onset potential measurement of Li-S batteries with NiS<sub>2</sub>/C HSs (a), C HSs (b) and Super P (c). The baseline current are obtained from the values before the cathodic and anodic peaks, where the value of current remain almost unchanged and the value of  $dI/dV \approx 0$ <sup>2</sup>. The onset current is 50  $\mu$ A beyond the baseline current (50  $\mu$ A more negative than baseline current for cathodic peak and 50  $\mu$ A more positive than baseline current for anodic peak)<sup>2</sup>.

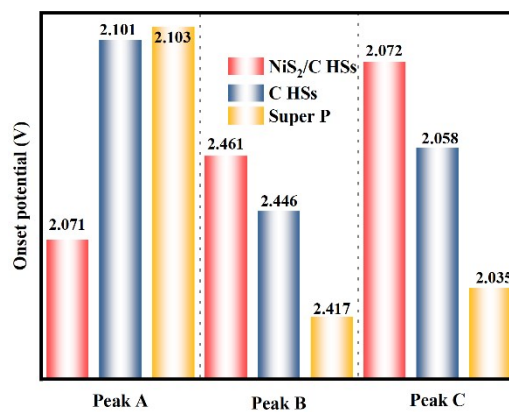

Fig. S7 The onset potential of Li-S batteries with NiS<sub>2</sub>/C HSs, C HSs and Super P.

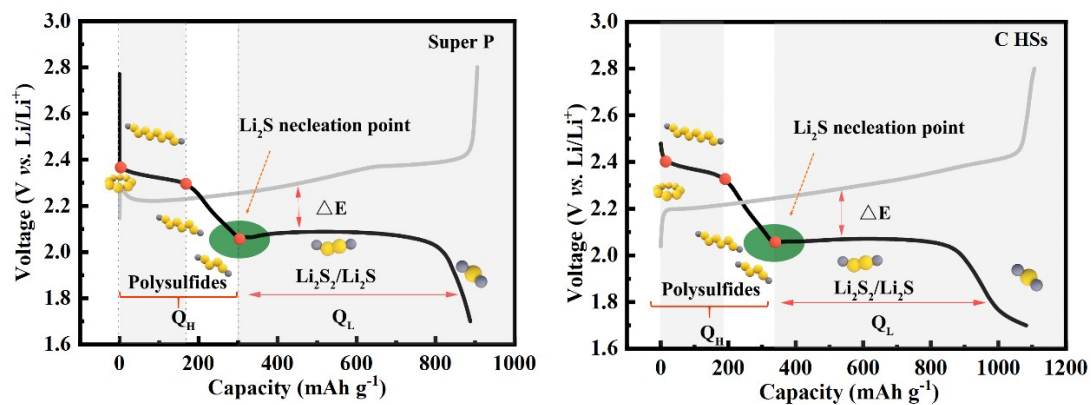

Fig. S8 The charge/discharge profiles of the cells with Super P and C HSs.

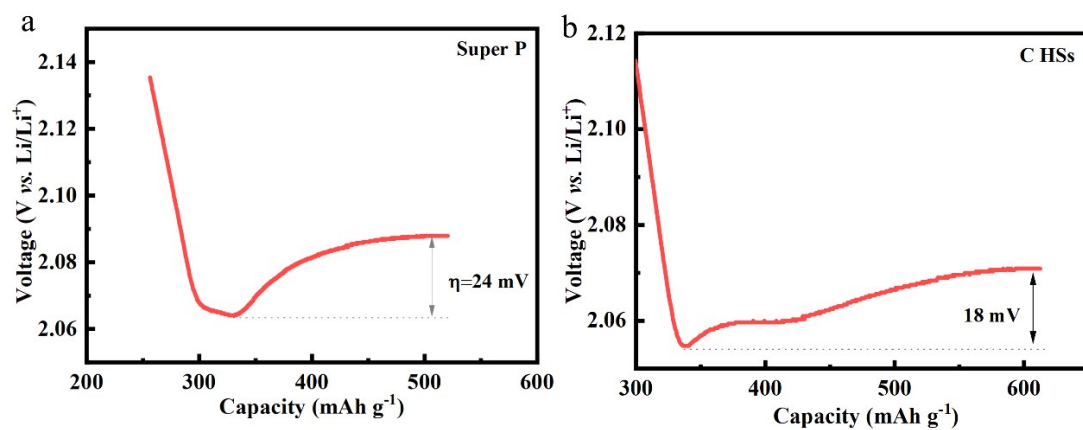

Fig. S9 The nucleation overpotential of  $\text{Li}_2\text{S}$  of the cells with Super P (a) and C HSs (b).

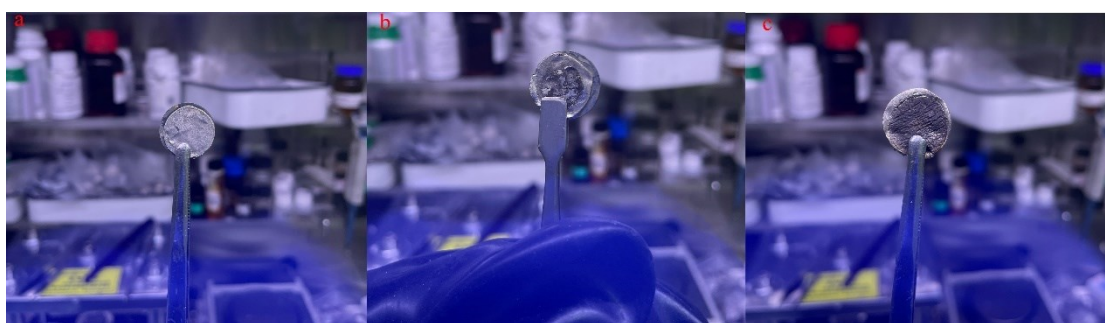

Fig. S10 The digital photographs of Li anode disassembled from the Li-S cells with  $\text{NiS}_2/\text{C}$  HSs (a), C HSs (b) and Super P (c).



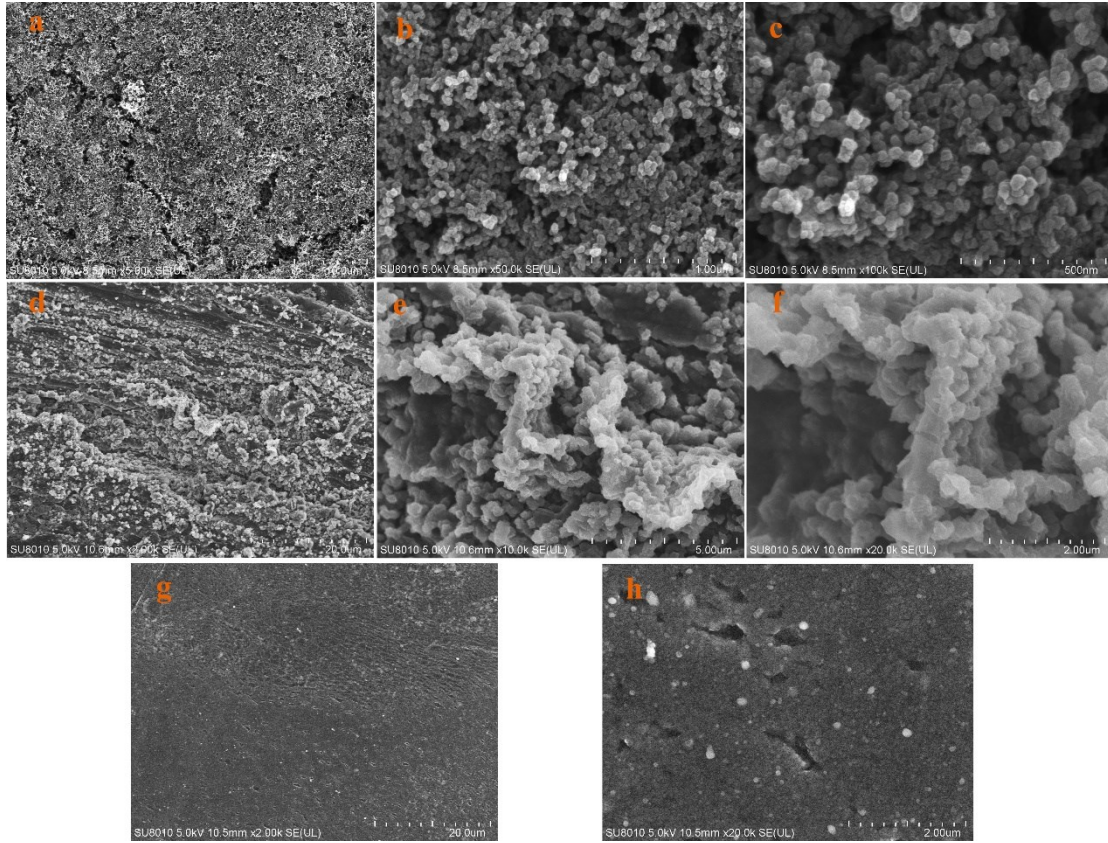

Fig. S11 SEM images of Li anode of the cells with C HSs (a-c), Super P (d-f), and NiS<sub>2</sub>/C HSs (g, h).

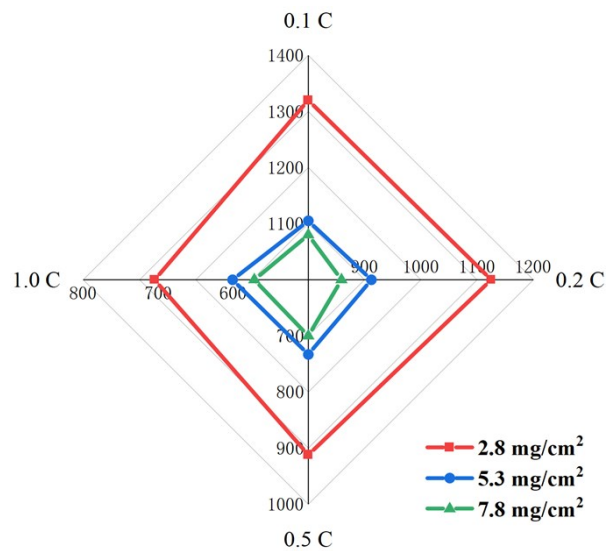

Fig. S12 The rate performance of the cells with NiS<sub>2</sub>/C HSs under 2.8 mg/cm<sup>2</sup>, 5.3 mg/cm<sup>2</sup> and 7.8 mg/cm<sup>2</sup> sulfur loadings.

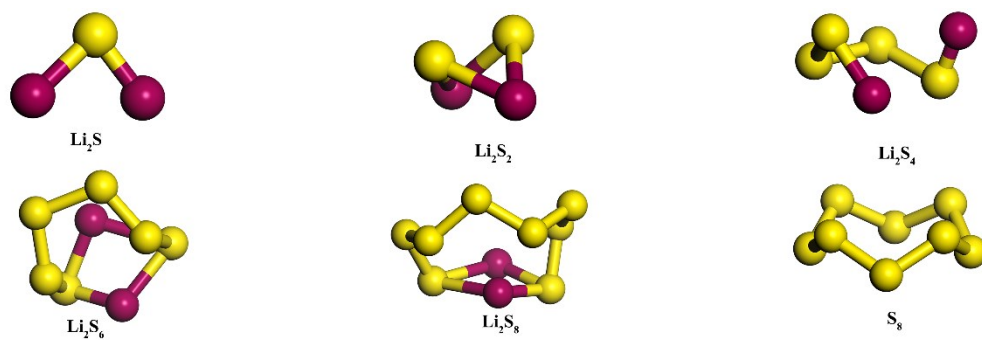

Fig. S13 The optimized geometries of  $\text{Li}_2\text{S}$ ,  $\text{Li}_2\text{S}_2$ ,  $\text{Li}_2\text{S}_4$ ,  $\text{Li}_2\text{S}_6$ ,  $\text{Li}_2\text{S}_8$  and  $\text{S}_8$ .

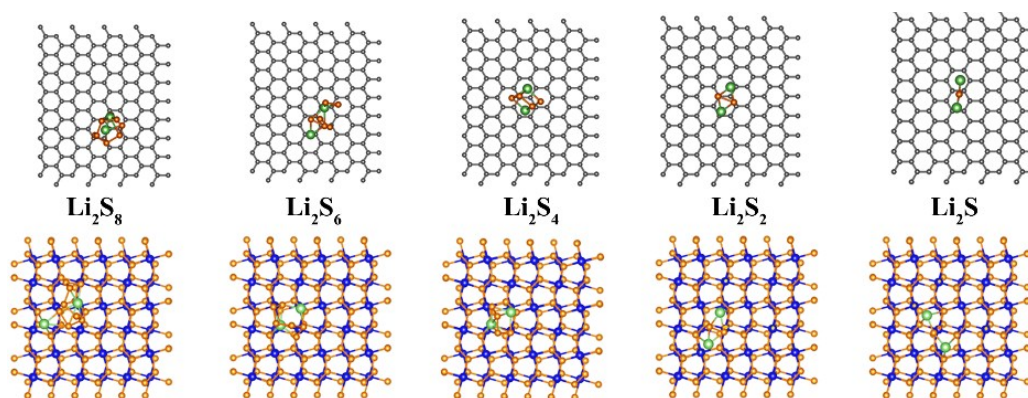

Fig. S14 Optimized configurations of polysulfides adsorption on graphene and  $\text{NiS}_2$ .

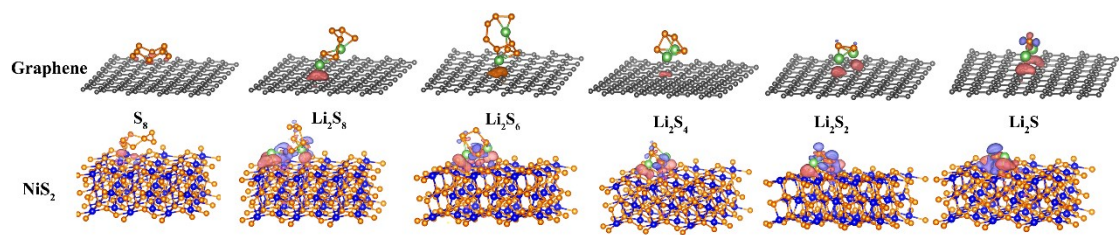

Fig. S15 The charge density difference of polysulfides adsorbed at graphene and  $NiS_2$ , in which, blue denoted the decrease of charge and red denoted charge accumulation.

Table. S1 The electrochemical performance of various cathodes of Li-S batteries.

| Cathode                                | Current rate (C)         | Area loading (mg cm <sup>-2</sup> ) | Areal capacity (mAh cm <sup>-2</sup> ) | Ref.      |
|----------------------------------------|--------------------------|-------------------------------------|----------------------------------------|-----------|
| NiS <sub>2</sub> /C HSs                | 0.2                      | 7.8                                 | 6.6                                    | This work |
| NiS <sub>2</sub> /C HSs                | 0.2                      | 5.3                                 | 4.8                                    | This work |
| NiS <sub>2</sub> /C HSs                | 0.2                      | 2.8                                 | 3.1                                    | This work |
| Co,N-G@CNT/S                           | 0.2                      | 4.2                                 | 4.4                                    | 3         |
| S@CPZC                                 | 0.2                      | 9.2                                 | 7.1                                    | 4         |
| S@CPZC                                 | 0.2                      | 5.1                                 | 4.7                                    | 4         |
| H-S@Co-CNCs                            | 0.2                      | 4.0                                 | 2.7                                    | 5         |
| CNT-NC@GC/S                            | 0.2                      | 3.36                                | 3                                      | 6         |
| S@H-LDH                                | 0.2                      | 1.5                                 | 1.3                                    | 7         |
| CNF/LPS/CNT                            | 0.2                      | 7.64                                | 3.5                                    | 8         |
| S/CoNi@PNCFs                           | 0.2                      | 4.5                                 | 4                                      | 9         |
| Sb <sub>2</sub> Se <sub>3-x</sub> /rGO | 0.2                      | 3                                   | 2.9                                    | 10        |
| NC/MoS <sub>3</sub> -S NBs             | 0.2                      | 5.5                                 | 4.5                                    | 11        |
| COF-MF@S                               | 3.43 mA cm <sup>-2</sup> | 4.1                                 | 3.7                                    | 12        |
| N-PC@uCo/S                             | 0.2                      | 5.9                                 | 4.8                                    | 13        |
| 3WO <sub>3</sub> -WS <sub>2</sub> /S   | 0.5                      | 5.0                                 | 4.4                                    | 14        |
| 3WO <sub>3</sub> -WS <sub>2</sub> /S   | 0.5                      | 10.0                                | 4.7                                    | 14        |
| ZnS <sub>1-x</sub> -CC/S               | 0.1                      | 5.0                                 | 3.5                                    | 15        |
| NiCoO <sub>4</sub> /CNF/S              | 0.1                      | 6.9                                 | 4.6                                    | 16        |

## References

- 1 J. Li, J. Li, D. Yan, S. Hou, X. Xu, T. Lu, Y. Yao, W. Mai and L. Pan, *J. Mater. Chem. A*, 2018, **6**, 6595-6605.
- 2 W. Yao, W. Zheng, J. Xu, C. Tian, K. Han, W. Sun and S. Xiao, *ACS Nano*, 2021, DOI: 10.1021/acsnano.1c00270.
- 3 D. Cheng, Y. Zhao, X. Tang, T. An, X. Wang, H. Zhou, D. Zhang and T. Fan, *Carbon*, 2019, **149**, 750-759.
- 4 G. Li, W. Lei, D. Luo, Y. Deng, Z. Deng, D. Wang, A. Yu and Z. Chen, *Energy Environ. Sci.*, 2018, **11**, 2372-2381.
- 5 Q. Wu, X. Zhou, J. Xu, F. Cao and C. Li, *ACS Nano*, 2019, **13**, 9520-9532.
- 6 F. Zhou, Z. Qiao, Y. Zhang, W. Xu, H. Zheng, Q. Xie, Q. Luo, L. Wang, B. Qu and D.-L. Peng, *Electrochim. Acta*, 2020, **349**, 136378.
- 7 S. Chen, J. Luo, N. Li, X. Han, J. Wang, Q. Deng, Z. Zeng and S. Deng, *Energy Storage Mater.*, 2020, **30**, 187-195.
- 8 Y. Li, C. Wang, W. Wang, A. Y. S. Eng, M. Wan, L. Fu, E. Mao, G. Li, J. Tang, Z. W. Seh and Y. Sun, *ACS Nano*, 2020, **14**, 1148-1157.
- 9 Y. He, M. Li, Y. Zhang, Z. Shan, Y. Zhao, J. Li, G. Liu, C. Liang, Z. Bakenov and Q. Li, *Adv Funct Mater*, 2020, **30**, 2000613.
- 10 Y. Tian, G. Li, Y. Zhang, D. Luo, X. Wang, Y. Zhao, H. Liu, P. Ji, X. Du, J. Li and Z. Chen, *Adv. Mater.*, 2020, **32**, 1904876.
- 11 J. Yu, J. Xiao, A. Li, Z. Yang, L. Zeng, Q. Zhang, Y. Zhu and L. Guo, *Angew. Chem.-Int. Edit.*, 2020, **59**, 13071-13078.
- 12 X. Hu, J. Jian, Z. Fang, L. Zhong, Z. Yuan, M. Yang, S. Ren, Q. Zhang, X. Chen and D. Yu, *Energy Storage Mater.*, 2019, **22**, 40-47.
- 13 R. Wang, J. Yang, X. Chen, Y. Zhao, W. Zhao, G. Qian, S. Li, Y. Xiao, H. Chen, Y. Ye, G. Zhou and F. Pan, *Adv. Energy Mater.*, 2020, **10**, 1903550.
- 14 B. Zhang, C. Luo, Y. Deng, Z. Huang, G. Zhou, W. Lv, Y.-B. He, Y. Wan, F. Kang and Q.-H. Yang, *Adv. Energy Mater.*, 2020, **10**, 2000091.
- 15 J. Wang, Y. Zhao, G. Li, D. Luo, J. Liu, Y. Zhang, X. Wang, L. Shui and Z. Chen, *Nano Energy*, 2021, **84**, 105891.
- 16 J.-X. Lin, X.-M. Qu, X.-H. Wu, J. Peng, S.-Y. Zhou, J.-T. Li, Y. Zhou, Y.-X. Mo, M.-J. Ding, L. Huang and S.-G. Sun, *ACS Sustain. Chem. Eng.*, 2021, **9**, 1804-1813.
